# Supplementary material
Source: publisher site journal article supplement (https://www.spandidos-publications.com/3391/downloadSupplementary)

Figure S1. Aminophylline dose and permeability curve. Permeability of HUVECs in LPS-induced inflammation was attenuated by aminophylline. HUVECs were incubated with 200  $\mu\text{g}/\text{ml}$  LPS for 24 h. Dextran permeability assay showed that aminophylline significantly represses permeability in a dose-dependent manner. \* $P < 0.05$  vs. control group. The data are presented as the mean  $\pm$  standard error of the mean. All experiments were repeated at least three times. HUVECs, human umbilical vein endothelial cells; LPS, lipopolysaccharide.

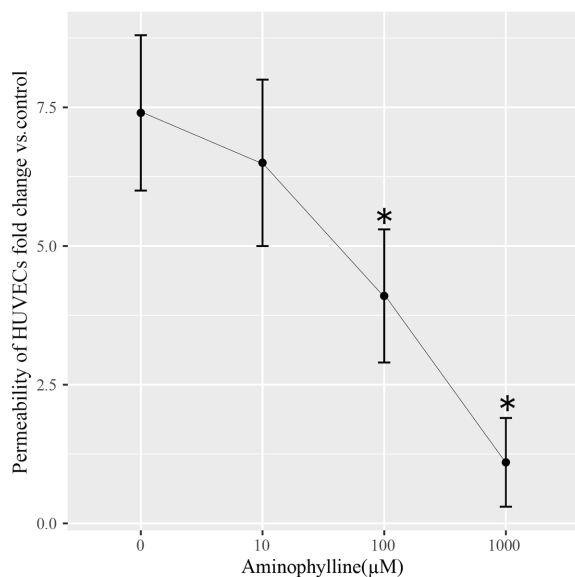

Supplement: Supplementary file 1 [file downloadSupplementary]
